# Supplementary material
Source: bioRxiv or medRxiv preprint supplement (http://medrxiv.org/highwire/filestream/77582/field_highwire_adjunct_files/0/2020.04.18.20070755-1.pdf)
Supplement: Supplementary file [file 2020.04.18.20070755-1.pdf]

## Supplemental information

### Supplemental methods:

Standard approach for detection of SARS-CoV-2 RNA from nasopharyngeal specimens in our laboratory involves extraction of total nucleic acids from specimens in an IVD-labeled, automated extraction platform followed by RT-qPCR, based on one of the assays (Table S1) suggested by World Health Organization (WHO)(1). The performance standards of the assay were established in our laboratory according to College of American Pathologists (CAP) standards, and at time of writing this paper, the assay was used to test more than 2000 respiratory specimens to screen patients for potential infection with SARS-CoV-2. Therefore, the assay was used as the reference method for all other alternative approaches assessed in this study.

Clinical specimens: Nasopharyngeal flocked swab (NPFS) specimens collected in universal transport medium (UTM)(Copan Diagnostics) (n= 150) submitted for testing SARS-CoV-2 or other respiratory viruses at Sidra Medicine, Doha, Qatar were used in this study. For spiking experiments, NPFS specimens (n=6) were collected from laboratory members, who agreed to volunteer for the study. To maintain patient anonymity, each sample was coded and all patient identifiers were removed to ensure that personnel involved in this study were unaware of any patient information.

Nucleic acid extraction: Nucleic acids from 0.2 ml of NPFS specimens were extracted on a NucliSENS® easyMAG platform (bioMérieux, France) according to the methods described by the manufacturers.

Pre-treatment of specimens: Unless otherwise stated, specimens were diluted using nuclease free water. Heat treatment of specimens at different temperature was performed in a ThermoMixer (Eppendorf). Specimens processed with Arcis Coronavirus RNA extraction research kit (Arcis Biotechnology) were performed according to manufacturer's instructions. Briefly, 90 µl specimen was mixed with 6 µl Reagent 1 RTU and either left unheated or heat lysed at 60°C for 5 minutes. 40 µl of lysate was then mixed with 2 µl of Reagent 2a and was used directly for RT-qPCR. For Takara PrimeDirect™ Probe RT-qPCR Mix (Takara Bio), 0.2 ml specimens were heated at 99°C for 10 mins and then centrifuged at 4000rpm for 5 min. The supernatants were collected and 7µl of supernatant was directly used in RT-qPCR reaction mixture.

RT-qPCR: Primers and probes for detection of SARS-CoV-2, HCoV-HKU1 and MS2 bacteriophage are listed in Table S1. For detection of HCoV-HKU1 using Quantifast Pathogen RT-PCR + IC kit (Qiagen), five µl of extracted or pre-treated samples were mixed with 20 µl of a master mix containing 5 µl of Quantifast Pathogen RT-PCR + IC Master Mix, 0.25 µl of Quantifast RT Mix and 0.5 µl of 50XROX dye solution and primers and probes to final concentrations shown in Table S1. Thermal cycling was performed in a ABI7500 Fast instrument (ThermoFisher Scientific, USA) with 1 cycle of reverse transcription at 50°C for 20 min followed by 1 cycle of PCR activation at 95°C for 5 min, followed by 40 amplification cycles each consisting of 95°C-15s and 60°C-60s. For detection of HCoV-HKU1 using TaqPath™ 1-Step RT-qPCR kit (ThermoFisher), five µl of extracted or pre-treated samples were mixed with 5 µl of a master mix containing 5 µl of TaqPath™ 1-Step RT-qPCR Master Mix and primers and probes to final concentrations shown in Table S1. Thermal cycling was performed in a ABI7500 Fast instrument (ThermoFisher Scientific, USA) with 1 cycle of reverse transcription at 50°C for 15 min followed by 1 cycle of polymerase activation at 95°C for 2 min, followed by 40 amplification cycles each consisting of 95°C-15s and 60°C-60s.

For detection of SARS-CoV-2 with standard method, five µl of nucleic acid extracts from NucliSENS® easyMAG system were mixed with 7.5 µl of a master mix containing 2.5 µl of Quantifast Pathogen RT-PCR + IC Master Mix, 0.125 µl of Quantifast RT Mix and 0.25 µl of 50 X ROX dye solution and primers and probes to final concentrations shown in Table S1. RNA extraction and PCR inhibition were monitored by an internal control PCR assay, using the primers and probes shown in TableS1. Specimens were spiked with a tittered preparation of MS2 bacteriophage to serve as a template for internal control assay. For direct PCR on specimens, pre-treated specimens were assessed in the same way except that extracted MS2 bacteriophage RNA was mixed with PCR master mix to serve as an inhibition control. A synthetic RNA (IDT) based on E-Sarbeco assay (1) amplicon sequence was used as a positive control. As negative control, 0.2 ml neonatal calf serum (NCS) (ThermoFisher Scientific, USA) was extracted along with specimens and used with each PCR run. SARS-CoV-2 RT-qPCR with Takara PrimeDirect™ Probe RT-qPCR Mix was performed as described by the manufacturer. Briefly, 7 µl of processed samples were mixed with 18 µl of master mix containing 12.5 µl of PrimeDirect Probe

RT-qPCR Mix and primers and probes to final concentrations shown in Table S1. Thermal cycling was performed in a ABI7500 Fast instrument (ThermoFisher Scientific, USA) with 1 cycle of denaturation at 96°C for 10 sec, 1 cycle of reverse transcription at 60°C for 5 min followed by 45 amplification cycles each consisting of 95°C-5s and 60°C-30s. SARS-CoV-2 RT-qPCR with TaqPath™ 1-Step RT-qPCR kit with the optimized approach (specimens heat treated at 65°C for 10 min) was performed as above except that 8 µl of specimen was used per 20 µl reaction.

Statistical analysis: Sensitivity, defined as the number of true positive results divided by the sum of true positive and false negative results; specificity, defined as the number of true negative results divided by the sum of true negative and false positive results; and accuracy (concordance), defined as the sum of true positive and true negative results divided by the total number of test samples, were calculated and expressed as percentages. Ninety-five percent confidence intervals (CI) for sensitivity, specificity and accuracy were calculated by the Clopper-Pearson interval or exact method using an online, diagnostic test evaluation calculator (MedCalc, 2018). Correlation between the RT-qPCR CT values between standard approach and optimized direct approach was determined by Pearson's coefficient calculator.

### Supplemental tables

**Table S1: Primers and probes used in this study**

| Assay      | Target            | Name         | Sequence (5'- 3')                  | 5'-Label | 3'-Label | Final concentration (µM) | Source |
|------------|-------------------|--------------|------------------------------------|----------|----------|--------------------------|--------|
| HCoV-HKU1  | Nucleocapsid gene | HCoV-HKU1-F  | GATCCTACTAYTCAAGAAGC<br>TATCCCTACT |          |          | 0.6                      | (1)    |
|            |                   | HCoV-HKU1-R  | ACCTTCCTGAGCCTTCAACA<br>TAAT       |          |          | 0.3                      |        |
|            |                   | HCoV-HKU1-P  | TTYCGCCTGGTACGATTTT<br>GCCTC       | JOE/ZEN  | laBkFQ   | 0.2                      |        |
| SARS-CoV-2 | E gene            | E_Sarbeco_F1 | ACAGGTACGTTAATAGTTAA<br>TAGCGT     |          |          | 0.4                      | (2)    |
|            |                   | E_Sarbeco_R2 | ATATTGCAGCAGTACGCACA<br>CA         |          |          | 0.4                      |        |
|            |                   | E_Sarbeco_P1 | ACACTAGCCATCCTTACTGC<br>GCTTCG     | FAM/ZEN  | laBkFQ   | 0.2                      |        |
|            | Internal control  | MS2-TM3-F    | GGCTGCTCGCGGATACCC                 |          |          | 0.2                      | (3)    |
|            |                   | MS2-TM3-R    | TGAGGGAATGTGGGAACCG                |          |          | 0.2                      |        |
|            |                   | MS2-TM2JOE   | ACCTCGGGTTTCCGTCTTGC<br>TCGT       | JOE/ZEN  | laBkFQ   | 0.1                      |        |

**Table S2: Direct RT-qPCR on a nasopharyngeal specimen positive for human coronavirus HKU1 after heat treatment at 100°C for 5 minutes**

| Sample Name | Sample dilution  | Sample processing  | HKU1 CoV C <sub>T</sub>                    |                                    |
|-------------|------------------|--------------------|--------------------------------------------|------------------------------------|
|             |                  |                    | Quantifast Pathogen RT-PCR + IC Master Mix | TaqPath™ 1-Step RT-qPCR Master Mix |
| 1167-H0     | Undiluted        | easyMAG extraction | 24.6                                       | 23.8                               |
| 1167-H1     | Undiluted        | Heat treatment     | 36.4                                       | 36.6                               |
| 1167-H2     | 2 fold dilution  | Heat treatment     | 34.5                                       | 35.7                               |
| 1167-H3     | 4 fold dilution  | Heat treatment     | 34.7                                       | 35.6                               |
| 1167-H4     | 10 fold dilution | Heat treatment     | 34.1                                       | 33.2                               |

|         |           |                             |      |      |
|---------|-----------|-----------------------------|------|------|
| 1167-H5 | Undiluted | Freeze thaw; heat treatment | 38.1 | 36.1 |
|---------|-----------|-----------------------------|------|------|

NPFS specimens were either i) subjected to viral RNA extraction by standard method using a NucliSENS easyMAG automated extraction system (Biomerieux), or ii) serially diluted with nuclease free water (NFW) followed by incubation at 100°C for 5 minutes, or iii) freeze thawed once prior to heat treatment. All heat-treated samples were centrifuged at 13,000 rpm for 5 minutes at 4°C and supernatants were collected. All samples were tested for SARS-CoV-2 RNA by standard RT-qPCR in duplicate and mean C<sub>T</sub> values were compared.

**Table S3: Direct RT-qPCR on simulated, dry NPFS using a spiked specimen positive for SARS-CoV-2**

| Sample No. | SARS-CoV-2 C <sub>T</sub> |                        |
|------------|---------------------------|------------------------|
|            | Standard method           | Direct PCR on dry NPFS |
| 1          | 20.8                      | 32.4                   |
| 2          | 20.5                      | 25.8                   |
| 3          | 20.8                      | 32.4                   |
| 4          | 25.7                      | 31.6                   |
| 5          | 25.8                      | 33.8                   |
| 6          | 25.6                      | 34.5                   |

Specimens were collected from laboratory members who volunteered to provide specimens. NPFS specimens were either i) collected in VTM or ii) collected in sterile empty tubes as dry swabs and later resuspended in 1 ml of NFW. Five µl of a patient specimen positive for SARS-CoV-2 RNA (C<sub>T</sub> = 22) were spiked into 0.2 ml of specimens collected in VTM of NFW. VTM specimens were extracted by standard method using a NucliSENS easyMag automated extraction system (bioMerieux). Specimens collected in NFW were incubated at 100°C for 5 minutes and centrifuged at 13,000 rpm for 5 minutes at 4°C and supernatants were collected. All samples were tested for SARS-CoV-2 RNA by standard RT-qPCR using Quantifast Pathogen RT-PCR + IC Master Mix in duplicate and mean C<sub>T</sub> values were compared.

**Table S4: Direct RT-qPCR on SARS-CoV-2 positive and negative NPFS specimens processed using Arcis Pathogen Kit**

| Sample No. | SARS-CoV-2 C <sub>T</sub> |                        |                        |
|------------|---------------------------|------------------------|------------------------|
|            | Standard method           | Arcis kit with heating | Arcis kit - no heating |
| 1          | Undetermined              | Undetermined           | Undetermined           |
| 2          | Undetermined              | Undetermined           | Undetermined           |
| 3          | Undetermined              | Undetermined           | Undetermined           |
| 4          | 25.0                      | 34.9                   | 33.5                   |
| 5          | 21.0                      | 32.9                   | Undetermined           |
| 6          | 23.0                      | 28.4                   | 32.3                   |

NPFS specimens were processed according to manufacturer's protocol (Arcis Biotechnology Ltd.). All samples were tested for SARS-CoV-2 RNA by standard RT-qPCR in duplicate and mean C<sub>T</sub> values were compared.

**Table S5: Direct RT-qPCR on SARS-CoV-2 positive and negative NPFS specimens processed using Takara**

| Sample No. | SARS-CoV-2 C <sub>T</sub> |                             |
|------------|---------------------------|-----------------------------|
|            | Standard method           | Takara PrimeDirect protocol |
| 1          | 21.5                      | 29.78692245                 |

|   |              |              |
|---|--------------|--------------|
| 2 | 34.5         | Undetermined |
| 3 | 24.5         | Undetermined |
| 4 | 33.7         | Undetermined |
| 5 | Undetermined | Undetermined |

NPFS specimens were processed according to manufacturer's protocol (PrimeDirect™ Probe RT-qPCR Mix, Takara Bio Inc.). All samples were tested for SARS-CoV-2 RNA by standard RT-qPCR in duplicate and mean C<sub>T</sub> values were compared.

**Table S6: Direct RT-qPCR on SARS-CoV-2 positive and negative NPFS specimens with or without heating at 65°C for 5 minutes or after lysis using a non-ionic detergent**

| Sample No. | SARS-CoV-2 C <sub>T</sub> |              |                |                          |
|------------|---------------------------|--------------|----------------|--------------------------|
|            | Standard method           | No treatment | Heat treatment | Lysis with 0.2% Tween-20 |
| 1          | 21.5                      | 30.6         | 26.7           | 28.4                     |
| 2          | 34.5                      | Undetermined | Undetermined   | Undetermined             |
| 3          | Undetermined              | Undetermined | Undetermined   | Undetermined             |
| 4          | Undetermined              | Undetermined | Undetermined   | Undetermined             |
| 5          | Undetermined              | Undetermined | Undetermined   | Undetermined             |

NPFS specimens were either i) subjected to viral RNA extraction by standard method using a NucliSENS easyMAG automated extraction system (bioMerieux), or ii) diluted 4-fold with nuclease free water (NFW) iii) diluted 4-fold with nuclease free water (NFW) followed by incubation at 65°C for 5 minutes or iv) diluted 4-fold with Tween-20 to final concentration of 0.2% followed by incubation at room temperature for 10 min. All samples were tested for SARS-CoV-2 RNA by standard RT-qPCR using Quantifast Pathogen RT-PCR + IC Master Mix.

## References

1. Corman VM, Landt O, Kaiser M, Molenkamp R, Meijer A, et al. Detection of 2019 novel coronavirus (2019-nCoV) by real-time RT-PCR. Euro Surveill. 2020;25(3).
2. Hasan MR, Al Mana H, Young V, Tang P, Thomas E, Tan R, et al. A novel real-time PCR assay panel for detection of common respiratory pathogens in a convenient, strip-tube array format. J Virol Methods. 2019;265:42-48.
3. Dreier J, Stormer M, Kleesiek K. Use of bacteriophage MS2 as an internal control in viral reverse transcription-PCR assays. J Clin Microbiol. 2005;43:4551-7.
